# Supplementary material for: ERBB2 overexpression suppresses stress-induced autophagy and renders ERBB2-induced mammary tumorigenesis independent of monoallelic Becn1 loss
Source: PubMed Central journal article supplement — Autophagy. 2014 Jan 30;10(4):662–76. doi: 10.4161/auto.27867 (PMC4091153; doi:10.4161/auto.27867), 2014-01-30
Supplement: auto-10-662-s01.pdf [file auto-10-662-s01.pdf]

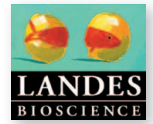

## **Supplemental Material to:**

**Fred Lozy, Xiaofeng Cai-McRae, Irina Teplova, Sandy Price,  
Anupama Reddy, Gyan Bhanot, Shridar Ganesan,  
Alexei Vazquez, and Vassiliki Karantza**

**ERBB2 overexpression suppresses stress-induced  
autophagy and renders ERBB2-induced mammary  
tumorigenesis independent of monoallelic Becn1 loss**

**Autophagy 2014; 10(4)**

**<http://dx.doi.org/10.4161/auto.27867>**

**[www.landesbioscience.com/journals/autophagy/article/27867](http://www.landesbioscience.com/journals/autophagy/article/27867)**

Figure S1

A

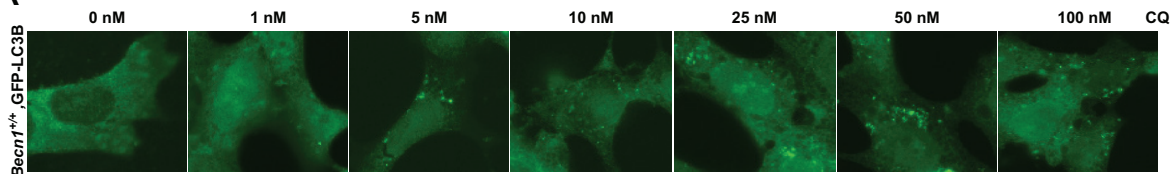

B

Bafilomycin A<sub>1</sub> titration

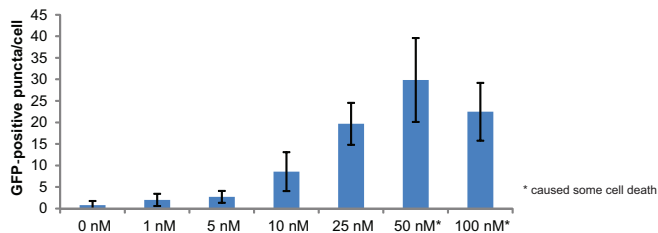

C

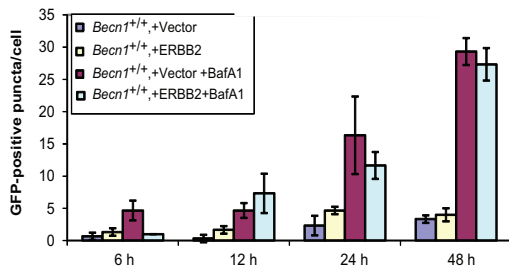

**Figure S1.** Bafilomycin A<sub>1</sub> titration to saturation of autophagic flux inhibition in *Becn1*<sup>+/+</sup> iMMECs. **(A)** GFP-fluorescence microscopy of EGFP-LC3B-expressing *Becn1*<sup>+/+</sup> iMMECs after 3 h of treatment with increasing concentrations of bafilomycin A<sub>1</sub> (0 to 100 nM) in regular culture medium. **(B)** Autophagy quantification of (A) based on number of GFP-fluorescent puncta per cell. Each data point is an average of triplicate experiments ± SD after quantifying puncta in 100 cells per experiment. **(C)** Autophagy quantification in *Becn1*<sup>+/+</sup> iMMECs maintained in regular culture medium, in the absence or presence of 25 nM BafA<sub>1</sub>, at 6 to 48 h post-transfection with a ERBB2-expressing or vector control plasmid.

**Figure S2**

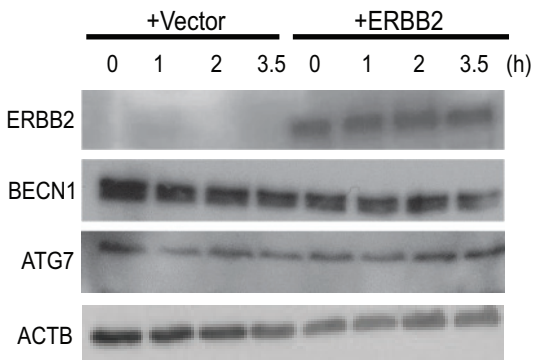

**Figure S2.** ERBB2 overexpression inhibits stress-induced autophagy without affecting autophagy regulator protein levels. BECN1, ATG7 and ACTB western blots of whole cell protein lysates from *Becn1*<sup>+/+</sup> iMMECs transiently expressing ERBB2 under nutrient deprivation (Hanks medium) for 0 to 3.5 h.

**Figure S3. Gene\_Signatures**

| <b>Gene signature name</b> | <b>Source</b>                                                                                                                                                           | <b>Gene list</b>                                                                                                                                                                                                                                                                                                                                                                                                                                                                                                                                                                                                                                                                                                                   |
|----------------------------|-------------------------------------------------------------------------------------------------------------------------------------------------------------------------|------------------------------------------------------------------------------------------------------------------------------------------------------------------------------------------------------------------------------------------------------------------------------------------------------------------------------------------------------------------------------------------------------------------------------------------------------------------------------------------------------------------------------------------------------------------------------------------------------------------------------------------------------------------------------------------------------------------------------------|
| Autophagy                  | GO:0006914                                                                                                                                                              | LRRK2,MTDH,HTR2B,DAP,BECN1,NPC1,TM9SF1,CTSB,LAMP1,GABARAPL2,WDR45L,DRAM1,MAP1LC3B,RB1CC1,ULK2,VMP1,KIAA1324,CLN3,WIPI1                                                                                                                                                                                                                                                                                                                                                                                                                                                                                                                                                                                                             |
| Fatty acid beta-oxidation  | GO:0006635                                                                                                                                                              | ACADM,ACADVL,ACADL,ETFDH,ACOX2,EHHADH,HADHB,HSD17B4,PEX7,SLC27A2,MUT,CPT2,CPT1A,HADH,MCEE,BDH2,FABP1,LONP2,ACOX3,ACAA1,SCP2                                                                                                                                                                                                                                                                                                                                                                                                                                                                                                                                                                                                        |
| Glycolysis                 | GO:0006096                                                                                                                                                              | HIF1A,ENO2,ENO1,HK1,HK2,PGK1,PFKFB3,PFKFB4,PFKP,PKM2,HKDC1,GPI,PGAM1,LDHB,LDHA,OGDHL,DLAT,TPI1,PDHA1,DDIT4                                                                                                                                                                                                                                                                                                                                                                                                                                                                                                                                                                                                                         |
| Oxidative phosphorylation  | GO:0006119                                                                                                                                                              | FXN,UQCRH,UQCRB,UQCRC2,ATP5D,UQCRC1,ATP5C1,MSH2,DLD,NDUFA4,NDUFAB1,NDUFA1,NDUFB5,NDUFB3,NDUFC1,NDUFA2,NDUFB6,NDUFA3,NDUFB4,NDUFB2,NDUFA7,NDUFC2,NDUFB10,NDUFB7,NDUFA8,NDUFV3,NDUFA6,NDUFA5,NDUFA9,NDUFAF1,NDUFB9,SDHAF2,UQCR10                                                                                                                                                                                                                                                                                                                                                                                                                                                                                                     |
| Proliferation              | <a href="http://www.broadinstitute.org/gsea/msigdb/cards/BENPORATH_PROLIFERATION.html">http://www.broadinstitute.org/gsea/msigdb/cards/BENPORATH_PROLIFERATION.html</a> | PRC1,CTPS,DBF4,DTYMK,S100A9,SNRPD1,TTK,AURKA,PTTG1,COX5A,COX4NB,APOBEC3B,CDCA7,H2AFV,PRIM2,H2AFZ,CDCA5,ASPM,TMEM14A,GTPBP4,DTL,NUDT5,MND1,TMSB10,MAD2L1,RFC4,SPAG5,HRASLS,CSTB,STMN1,NFE2L3,SNRPG,CTSL2,GGCT,NEK2,PPIL1,ANLN,MYBL2,PDSS1,PSMB4,CSE1L,CDC123,IDH2,PPPDE1,TP53BP2,GINS3,GARS,S100A11,NUF2,ATAD2,NDC80,RAD54L,SUV39H2,GART,HDAC2,CNIH4,PCNA,RIT1,HSPA14,PARP1,PDCD5,CHAF1B,FAM54A,DAP3,FAM3C,EZH2,DEK,CDT1,MAGOHB,FANCE,RANBP1,TOP2A,FANCA,LBR,KDELR2,CDK1,SLC25A5,MRPL9,PBK,MCM2,MC M3,SRPK1,RAD51,ANKRD27,PFDN2,RRM2,GNB4,KPNA2,UBE2T,CKS1B,NDUFB5,NMI,SHFM1,RDX,TYMS,CENPA,NCAPG,BUB1,GPSM2,PTS,EXO1,CENP N,GDI2,CENPM,RAD51AP1,PDCD10,MSH2,CEBPG,CENPF,BIRC5,CENPE,CDKN3,RACGAP1,MLF1IP,CCNB2,ILF2,TFRC,CKS2,LRP8 |

**Figure S3.** Gene\_Signatures. Gene signature list and source of individual gene signatures.

**Figure S4.** Figure 9 statistical analysis.

|                      |                           | C                                                               | D             | E             | F             | G    | H                                                                                           | I             | J             | K             |
|----------------------|---------------------------|-----------------------------------------------------------------|---------------|---------------|---------------|------|---------------------------------------------------------------------------------------------|---------------|---------------|---------------|
|                      |                           | Fraction of samples with signature up-regulation within subtype |               |               |               |      | Enrichment p-value of samples with signature up-regulation within subtype (data for Fig. 9) |               |               |               |
|                      | Signature                 | ERBB2-/BECN1-                                                   | ERBB2-/BECN1+ | ERBB2+/BECN1- | ERBB2+/BECN1+ |      | ERBB2-/BECN1-                                                                               | ERBB2-/BECN1+ | ERBB2+/BECN1- | ERBB2+/BECN1+ |
| Decremoux et al 2011 | Proliferation             | 0.64                                                            | 0.25          | 0.54          | 0.59          |      | 0.00                                                                                        | 1.00          | 0.16          | 0.12          |
|                      | Glycolysis                | 0.48                                                            | 0.15          | 0.37          | 0.44          |      | 0.00                                                                                        | 1.00          | 0.30          | 0.13          |
|                      | Oxidative phosphorylation | 0.31                                                            | 0.32          | 0.28          | 0.44          |      | 0.64                                                                                        | 0.58          | 0.84          | 0.11          |
|                      | Fatty acid beta-oxidation | 0.14                                                            | 0.47          | 0.20          | 0.41          |      | 1.00                                                                                        | 0.00          | 0.98          | 0.16          |
|                      | Autophagy                 | 0.16                                                            | 0.51          | 0.39          | 0.67          |      | 1.00                                                                                        | 0.01          | 0.62          | 0.00          |
|                      | ER-                       | 0.63                                                            | 0.15          | 0.48          | 0.37          |      | 0.00                                                                                        | 1.00          | 0.08          | 0.66          |
|                      | PR-                       | 0.73                                                            | 0.41          | 0.65          | 0.52          |      | 0.00                                                                                        | 1.00          | 0.13          | 0.80          |
|                      | Triple-                   | 0.63                                                            | 0.14          | -             | -             |      | 0.00                                                                                        | 1.00          | 1.00          | 1.00          |
| Hatzis et al 2011    | Signature                 | ERBB2-/BECN1-                                                   | ERBB2-/BECN1+ |               |               |      | ERBB2-/BECN1-                                                                               | ERBB2-/BECN1+ |               |               |
|                      | Proliferation             | 0.54                                                            | 0.35          |               |               |      | 0.00                                                                                        | 1.00          |               |               |
|                      | Glycolysis                | 0.47                                                            | 0.27          |               |               |      | 0.00                                                                                        | 1.00          |               |               |
|                      | Oxidative phosphorylation | 0.36                                                            | 0.59          |               |               |      | 1.00                                                                                        | 0.00          |               |               |
|                      | Fatty acid beta-oxidation | 0.09                                                            | 0.49          |               |               |      | 1.00                                                                                        | 0.00          |               |               |
|                      | Autophagy                 | 0.24                                                            | 0.48          |               |               |      | 1.00                                                                                        | 0.00          |               |               |
|                      | ER-                       | 0.57                                                            | 0.18          |               |               |      | 0.00                                                                                        | 1.00          |               |               |
|                      | PR-                       | 0.64                                                            | 0.34          |               |               |      | 0.00                                                                                        | 1.00          |               |               |
| Triple-              | 0.52                      | 0.16                                                            |               |               |               | 0.00 | 1.00                                                                                        |               |               |               |
| Servant et al 2011   | Signature                 | ERBB2-/BECN1-                                                   | ERBB2-/BECN1+ | ERBB2+/BECN1- | ERBB2+/BECN1+ |      | ERBB2-/BECN1-                                                                               | ERBB2-/BECN1+ | ERBB2+/BECN1- | ERBB2+/BECN1+ |
|                      | Proliferation             | 0.56                                                            | 0.31          | 0.53          | 0.33          |      | 0.00                                                                                        | 1.00          | 0.12          | 0.84          |
|                      | Glycolysis                | 0.37                                                            | 0.13          | 0.39          | 0.47          |      | 0.00                                                                                        | 1.00          | 0.04          | 0.06          |
|                      | Oxidative phosphorylation | 0.24                                                            | 0.27          | 0.16          | 0.13          |      | 0.53                                                                                        | 0.15          | 0.94          | 0.91          |
|                      | Fatty acid beta-oxidation | 0.10                                                            | 0.40          | 0.08          | 0.13          |      | 1.00                                                                                        | 0.00          | 1.00          | 0.91          |
|                      | Autophagy                 | 0.11                                                            | 0.28          | 0.13          | 0.33          |      | 1.00                                                                                        | 0.00          | 0.92          | 0.16          |
|                      | ER-                       | 0.43                                                            | 0.04          | 0.34          | 0.13          |      | 0.00                                                                                        | 1.00          | 0.05          | 0.88          |
|                      | PR-                       | 0.59                                                            | 0.20          | 0.63          | 0.47          |      | 0.00                                                                                        | 1.00          | 0.00          | 0.40          |
| Triple-              | 0.43                      | 0.03                                                            | -             | -             |               | 0.00 | 1.00                                                                                        | 1.00          | 1.00          |               |
| Sabatier et al 2012  | Signature                 | ERBB2-/BECN1-                                                   | ERBB2-/BECN1+ | ERBB2+/BECN1- | ERBB2+/BECN1+ |      | ERBB2-/BECN1-                                                                               | ERBB2-/BECN1+ | ERBB2+/BECN1- | ERBB2+/BECN1+ |
|                      | Proliferation             | 0.59                                                            | 0.41          | 0.50          | 0.62          |      | 0.00                                                                                        | 0.98          | 0.54          | 0.24          |
|                      | Glycolysis                | 0.42                                                            | 0.25          | 0.56          | 0.62          |      | 0.04                                                                                        | 1.00          | 0.07          | 0.05          |
|                      | Oxidative phosphorylation | 0.44                                                            | 0.50          | 0.25          | 0.54          |      | 0.69                                                                                        | 0.12          | 0.98          | 0.37          |
|                      | Fatty acid beta-oxidation | 0.14                                                            | 0.46          | 0.13          | 0.38          |      | 1.00                                                                                        | 0.00          | 0.98          | 0.35          |
|                      | Autophagy                 | 0.26                                                            | 0.56          | 0.38          | 0.62          |      | 1.00                                                                                        | 0.00          | 0.74          | 0.12          |
|                      | ER-                       | 0.58                                                            | 0.26          | 0.50          | 0.54          |      | 0.00                                                                                        | 1.00          | 0.37          | 0.30          |
|                      | PR-                       | 0.55                                                            | 0.42          | 0.44          | 0.31          |      | 0.04                                                                                        | 0.95          | 0.73          | 0.94          |
| Triple-              | 0.39                      | 0.15                                                            | -             | -             |               | 0.00 | 0.99                                                                                        | 1.00          | 1.00          |               |



**Figure S4.** Figure 9 statistical analysis. The fraction of samples manifesting significantly upregulated or downregulated expression for a given gene signature across breast cancer gene expression databases and breast cancer cohorts, defined by ERBB2 and *BECN1* status, was computed with Gene Set Enrichment Analysis (GSEA) (columns C to F). Statistical significance (*P*-value) was calculated by Fisher exact test (columns H to K).
